# Supplementary material for: Cerebrospinal Fluid Metabolomics Identified Ongoing Analgesic Medication in Neuropathic Pain Patients
Source: MDPI journal article supplement (doi:10.3390/biomedicines11092525), 2023-09-13
Supplement: s1 [file s1]

## Supplementary Materials S1

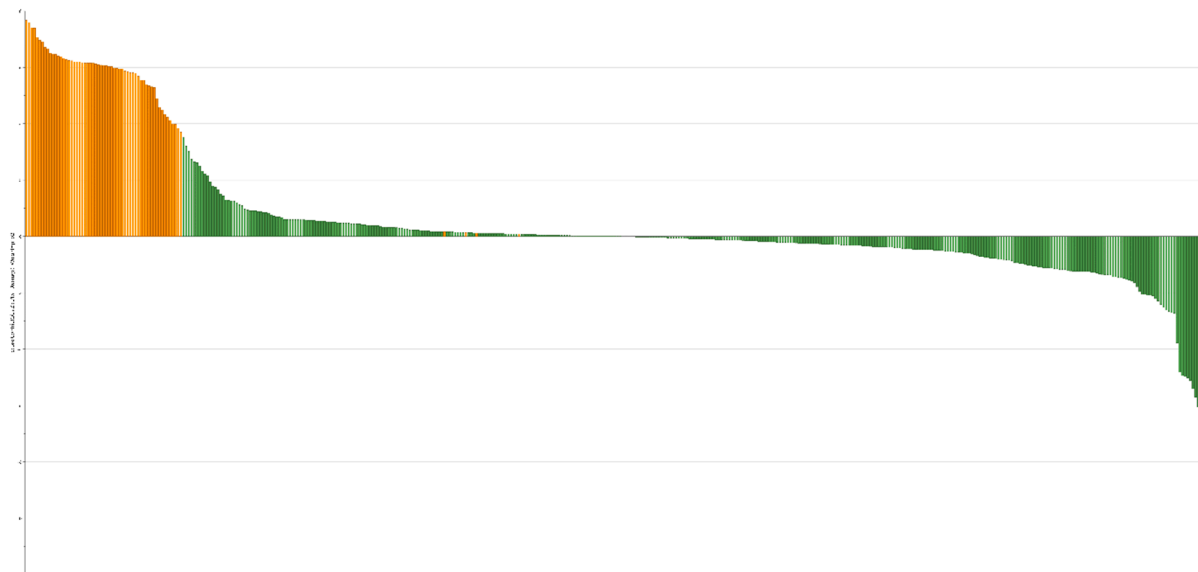

Above is a **contribution plot for patient Zic015**. Each column represents a X-variable, i.e., each column expresses the score contribution (called Weight) of each variable expressed as the difference between the individual in question and the average. Coloring is by SIMCA-default, orange columns showing the variables that contribute the most for Zic015. Below, for purposes of interpretation, we list the most important (“orange”) variables, in falling order of Weight. Note that glc=glucose and that the suffix C denotes cerebrospinal fluid:

| Name of X-variable         | Weight  |
|----------------------------|---------|
| beta-glc (attenuated) 67 C | 7.65321 |
| glc+gln 211 C              | 7.58669 |
| 493 C                      | 7.03222 |
| beta-glc (attenuated) 68 C | 6.90862 |
| glc 285 C                  | 6.73999 |
| 491 C                      | 6.6743  |
| 492 C                      | 6.66529 |
| glc 217 C                  | 6.63557 |
| glc 276 C                  | 6.55021 |
| alpha-glc 56 C             | 6.43098 |
| glc+fructose 173 C         | 6.42943 |
| alpha-glc 57 C             | 6.33893 |
| glc 277 C                  | 6.31861 |
| 298 C                      | 6.27931 |
| glc+fructose 176 C         | 6.20533 |
| glc 275 C                  | 6.20264 |
| glc 274 C                  | 6.19837 |
| glc 194 C                  | 6.17351 |
| glc+fructose 174 C         | 6.16794 |
| glc 219 C                  | 6.15058 |

|                    |         |
|--------------------|---------|
| glc+fructose 177 C | 6.1368  |
| glc 278 C          | 6.09901 |
| glc 271 C          | 6.0944  |
| glc 196 C          | 6.08112 |
| glc 189 C          | 6.06117 |
| glc 218 C          | 6.04696 |
| glc 190 C          | 6.03791 |
| glc 309 C          | 6.00169 |
| glc 199 C          | 5.98645 |
| glc 200 C          | 5.98247 |
| glc+fructose 222 C | 5.94988 |
| glc 216 C          | 5.94664 |
| glc 307 C          | 5.92836 |
| glc 215 C          | 5.90836 |
| glc 269 C          | 5.87302 |
| glc 310 C          | 5.85255 |
| glc 272 C          | 5.85083 |
| glc 273 C          | 5.85083 |

Hence, almost all important variable in the contribution plot are associated with glucose.

## Supplementary Materials S2

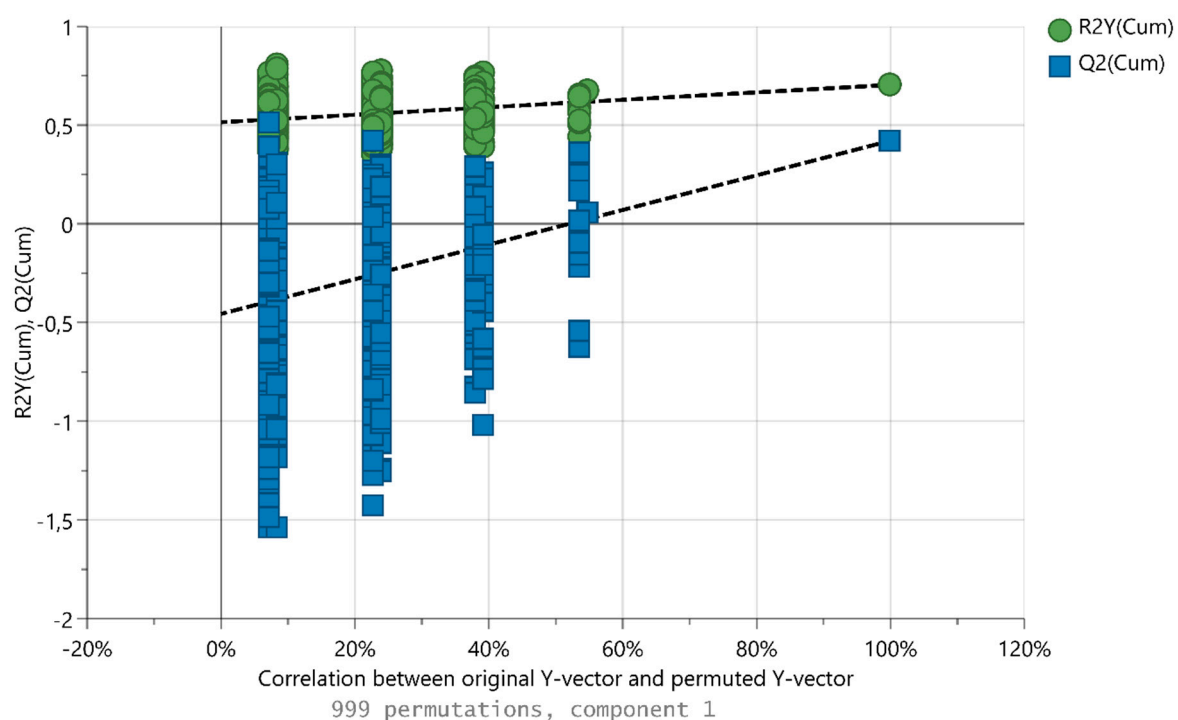

This is a permutation plot which confirms the validity of the OPLS-DA model, the intercept for Q2 being <0.

## Supplementary Materials S3

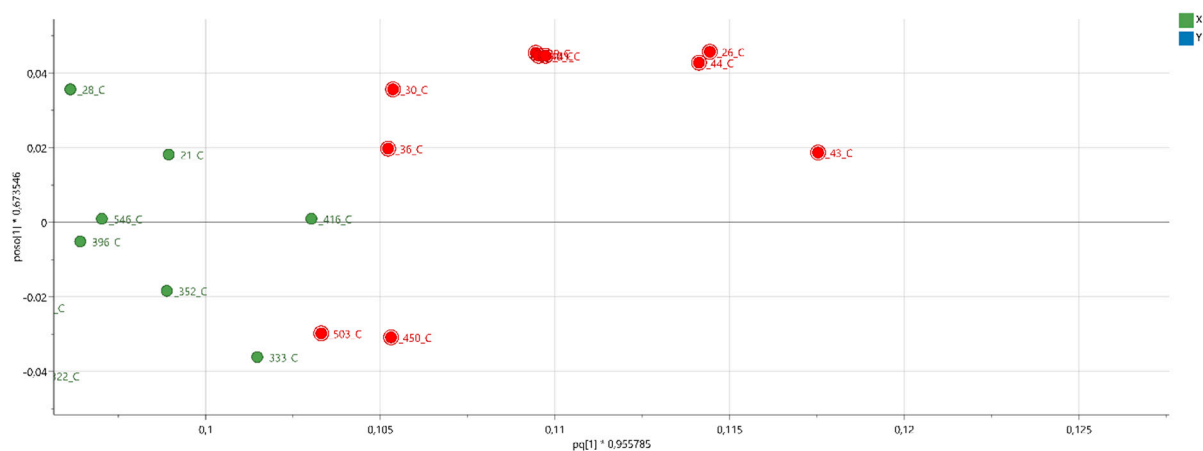

This is a zoomed-in part of the loading plot of the OPLS-DA model of patients vs. healthy controls. In other words, this is a part of the loading plot corresponding to the score plot depicted in **Figure 1** in the main text. The features mentioned in the paper are in red. Note especially the extremely high inter-correlation of 29\_C, 40\_C and 41\_C; so much so that the three are almost merged in the plot. This is confirmed by the fact that the corresponding bivariate correlation coefficients for these three features range 0.981-0.995 (Spearman's rho, see **Table 3** in the main text).

## Supplementary Materials S4

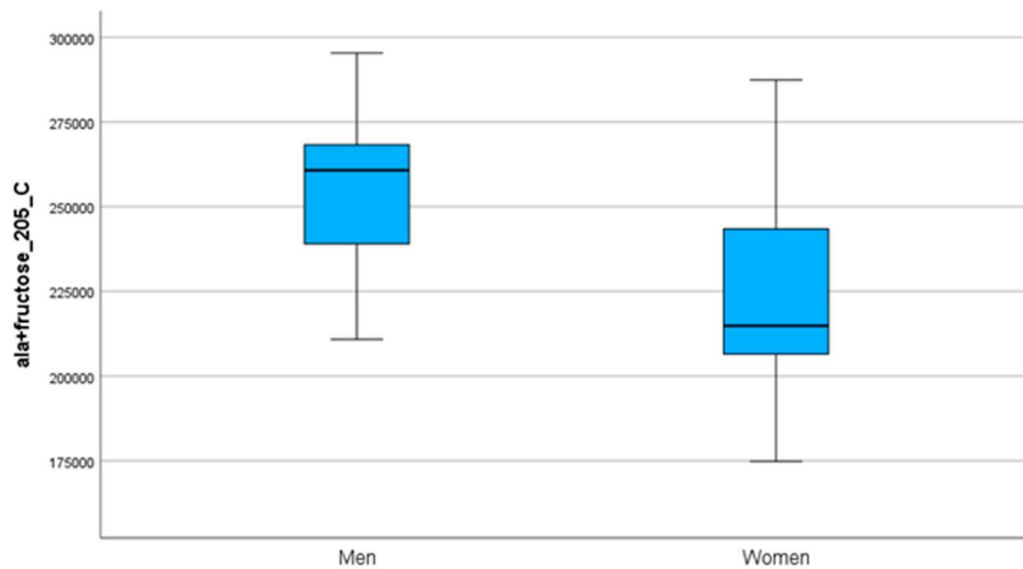

This box plot illustrates feature “ala+fructose\_205\_C” in patients, comparing men and women ( $p=0.125$ ).
